1 **A genome-wide association study of serum proteins reveals shared loci with common**  
2 **diseases**

3 Alexander Gudjonsson<sup>\*,1</sup>, Valborg Gudmundsdottir<sup>\*,1,2</sup>, Gisli T Axelsson<sup>1,2</sup>, Elias F  
4 Gudmundsson<sup>1</sup>, Brynjolfur G Jonsson<sup>1</sup>, Lenore J Launer<sup>3</sup>, John R Lamb<sup>4</sup>, Lori L Jennings<sup>5</sup>, Thor  
5 Aspelund<sup>1,2</sup>, Valur Emilsson<sup>#,1,2</sup> & Vilmundur Gudnason<sup>#,1,2</sup>

6  
7  
8  
9 <sup>1</sup>Icelandic Heart Association, Holtasmari 1, 201 Kopavogur, Iceland.

10 <sup>2</sup>Faculty of Medicine, University of Iceland, 101 Reykjavik, Iceland.

11 <sup>3</sup>Laboratory of Epidemiology and Population Sciences, Intramural Research Program, National  
12 Institute on Aging, Bethesda, MD 20892-9205, USA.

13 <sup>4</sup>GNF Novartis, 10675 John Jay Hopkins Drive, San Diego, CA 92121, USA.

14 <sup>5</sup>Novartis Institutes for Biomedical Research, 22 Windsor Street, Cambridge, MA 02139, USA.

15

16

17

18

19 \*These authors contributed equally as joint-first authors

20 #These authors contributed equally as joint-senior authors

21

22

23

24

25

26

27

28 Correspondence: v.gudnason@hjarta.is

29 **Keywords:** Proteomics, pQTLs, genomics, systems genetics, serum

## 30 **Abstract**

31 With the growing number of genetic association studies, the genotype-phenotype atlas has  
32 become increasingly more complex, yet the functional consequences of most disease  
33 associated alleles is not understood. The measurement of protein level variation in solid tissues  
34 and biofluids integrated with genetic variants offers a path to deeper functional insights. Here we  
35 present a large-scale proteogenomic study in 5,368 individuals, revealing 4,113 independent  
36 associations between genetic variants and 2,099 serum proteins, of which 37% are previously  
37 unreported. The majority of both *cis*- and *trans*-acting genetic signals are unique for a single  
38 protein, although our results also highlight numerous highly pleiotropic genetic effects on protein  
39 levels and demonstrate that a protein's genetic association profile reflects certain characteristics  
40 of the protein, including its location in protein networks, tissue specificity and intolerance to loss  
41 of function mutations. Integrating protein measurements with deep phenotyping of the cohort,  
42 we observe substantial enrichment of phenotype associations for serum proteins regulated by  
43 established GWAS loci, and offer new insights into the interplay between genetics, serum  
44 protein levels and complex disease.

45

## 46 **Main**

47 The identification of causal genes underlying common diseases has the potential to reveal novel  
48 therapeutic targets and provide readouts to monitor disease risk. Genome-wide association  
49 studies (GWAS) have identified thousands of genetic variants conferring risk of disease,  
50 however, the highly polygenic architecture of most common disorders<sup>1</sup> implies that the genetic  
51 component of common diseases is largely mediated through complex biological networks<sup>2,3</sup>.  
52 Identifying the causal mediators of mapped phenotype-associated genetic variation remains a  
53 largely unresolved challenge as majority of such variants reside in non-coding regulatory  
54 regions of the genome<sup>4</sup>. In fact, disease risk loci are enriched in regions of active chromatin  
55 involved in gene regulation<sup>5,6</sup>. Thus, the integration of intermediate molecular traits like mRNA<sup>7</sup>  
56 or proteins<sup>8-12</sup> with genetics and phenotypic information may aid the identification of causal  
57 candidates and functional consequences. Furthermore, the phenotypic pleiotropy observed at  
58 many loci<sup>13</sup> calls for a better understanding of the chain of events that are introduced by disease  
59 associated variants. Genetic perturbations may for instance drive molecular cascades through  
60 regulatory networks<sup>8</sup>, most of which have not yet been fully mapped, or as a consequence of

61 their phenotypic effects. Such downstream effects of genetic variants can be reflected in the  
62 molecular pleiotropy observed at some genetic loci, which may have important implications for  
63 therapeutic discovery including for estimating potential side effects<sup>14</sup>. For instance, many GWAS  
64 risk loci for complex diseases regulate multiple proteins in *cis* and *trans*, which often cluster in  
65 the same co-regulatory network modules<sup>8</sup>. Through the serum proteome we can gain a broad  
66 and well-defined description of the downstream effects of genetic variants, and their complex  
67 relationship with disease relevant traits.

68 The human plasma proteome consists of proteins that are secreted or shed into the  
69 circulation, either to carry out their function there or to mediate cross-tissue communications<sup>15</sup>.  
70 Proteins may also leak from tissues, for example as a result of tissue damage<sup>15</sup>. It has been  
71 noted that a large subset of *cis*-to-*trans* serum protein pairs (i.e. proteins that are regulated by  
72 the same genetic variant in *cis* or *trans*, respectively) have tissue specific expression but often  
73 involving distinct organ systems<sup>8</sup>, indicating that proteins in circulation may originate from  
74 virtually any tissue in the body. This suggests that system level coordination is facilitated to a  
75 considerable degree by proteins in blood, which if perturbed may mediate common disease<sup>16</sup>.  
76 These observations, together with the accessibility of blood compared to other tissues, make  
77 circulating proteins an attractive source for identifying molecular signatures of disease in large  
78 cohorts.

79 Recent technological advances now allow for high-throughput quantification of  
80 circulating proteins, which has resulted in the first large-scale studies<sup>8-12</sup> of protein quantitative  
81 trait loci (pQTLs) as recently reviewed<sup>17</sup>. Here, we present a large-scale proteogenomic study  
82 revealing thousands of independent genetic loci affecting a substantial proportion of the serum  
83 proteome, highlighting widespread pleiotropic effects of disease-associated genetic variation on  
84 serum protein levels. While our previous work reported associations to a restricted set of loci<sup>8</sup>,  
85 this is the first comprehensive GWAS for this number of serum proteins. A systematic  
86 integrative analysis furthermore demonstrates extensive associations between serum proteins  
87 and phenotypes that are regulated by the same genetic signals, adding further support to the  
88 therapeutic target and biomarker potential among proteins regulated by established GWAS risk  
89 variants.

90

91

## 92 Results

### 93 **Identification of *cis* and *trans* acting protein quantitative trait loci (pQTLs)**

94 We performed a GWAS of 4,782 serum proteins encoded by 4,135 unique human genes in the  
95 population-based AGES cohort of elderly Icelanders ( $n = 5,368$ , Table S1), measured by the  
96 slow-off rate modified aptamer (SOMAmer) platform as previously described<sup>8,18</sup>. On average the  
97 genomic inflation factor was low (mean  $\lambda = 1.045$ ,  $sd = 0.033$ ) and of the 7,506,463 genetic  
98 variants included in the analysis (Fig. S1), 269,637 variants exhibited study-wide significant  
99 associations ( $P < 5 \times 10^{-8} / 4,782 \text{ SOMAmers} = 1.046 \times 10^{-11}$ ) with 2,112 unique proteins, dubbed  
100 protein quantitative trait loci (pQTLs). In a conditional analysis, we identified 4,113 study-wide  
101 significant associations between 2,087 independent genetic signals in 799 loci (defined as  
102 genetic signals within 300kb of each other) and 2,099 unique proteins (Fig. 1A-C, Tables S2-  
103 S4). Here we defined a genetic signal as a set of genetic variants in linkage disequilibrium (LD)  
104 that were associated with one or more proteins. For each associated protein, a genetic signal  
105 has a lead variant, defined as the genetic variant that is most confidently associated with the  
106 protein, i.e. with the lowest P-value (see Methods for details). Among the 4,113 independent  
107 associations, those in *cis* (signal lead variant within 300kb of the protein-encoding gene  
108 boundaries,  $n = 1,429$ ) tended to have larger effect sizes than those in *trans* (signal lead variant  
109  $>300\text{kb}$  from the protein-encoding gene boundaries,  $n = 2,684$ ) (Fig. S2A). We found that  
110 almost half ( $977/2,099 = 47\%$ ) of all proteins with any independent genetic associations had  
111 more than one signal (Fig. 1B). Of those, 579 proteins (59%) had more than one independent  
112 signal within the same locus (Fig. S2B) and 697 proteins (71%) had signals in distinct locations  
113 in the genome. The protein with the largest number of associated loci was TENM3 (10 loci),  
114 followed by NOG (9 loci), GRAMD1C and TMCC3 (7 loci each).

115 The majority of genetic signals were only associated with a single protein (Fig.1C), or  
116 98% of *cis* signals and 73% of *trans* signals, and can as such be considered specific for the  
117 given protein based on a recently proposed classification of *trans*-pQTLs<sup>11</sup>. Furthermore, we  
118 have previously shown that proteins regulated in *trans* by the same genetic variant often cluster  
119 in the same coregulatory networks, sharing functionality and a disease relationship, although  
120 they may often differ in tissue origin<sup>8</sup>. However, as in previous studies<sup>8-11</sup>, we identified  
121 numerous hotspots of *trans* protein associations, or more specifically 35 independent signals  
122 that were associated with 10 or more proteins each at a study-wide significant threshold (Fig.  
123 1A,C). The largest of these *trans* hotspots represents the variant rs704, a missense variant  
124 within the Vitronectin (*VTN*) gene, which was associated with 598 proteins. Many of these *trans*

125 hotspots are well established as such, including the *VTN*, *ABO*, *APOE*, *CFH* and *BCHE* loci<sup>8-11</sup>.  
126 Other notable *trans* hotspots included for instance variants in or near the Lipopolysaccharide  
127 Binding Protein (*LBP*) and Metastasis-Associated 1 (*MTA1*) genes. *LBP* is involved in the innate  
128 immune response to bacterial infections and *MTA1* encodes a transcriptional coregulator  
129 upregulated in numerous cancer types and associated with cancer progression<sup>19</sup>. Of the 35  
130 *trans* hotspots, 14 also affected protein levels encoded by proximal genes, thus acting in *cis* as  
131 well (Table S3).

132 In contrast to the *trans* acting hotspots, we also observed genetic regions with high  
133 density of independent signals, each of which were not necessarily associated with many  
134 proteins. One such region stood out in particular on chromosome 3 (Fig. 1A), where 30  
135 independent signals were observed for a total of 55 proteins within a 300kb window (Fig. S3A),  
136 of which six proteins (*ADIPOQ*, *AHSG*, *DNAJB11*, *FETUB*, *HRG* and *KNG1*) were regulated in  
137 *cis*. Further analysis of this region demonstrated a sparse LD structure (Fig. S3A), allowing for  
138 this high density of independent signals, and revealing a subcluster of 15 genetic signals  
139 affecting 32 proteins in various constellations (Fig. S3B), that were enriched for Toll Like  
140 Receptor 7/8 cascade (FDR =  $4.8 \times 10^{-3}$ ) and MAP kinase activation (FDR =  $4.8 \times 10^{-3}$ ).

141 To define what proportion of the pQTLs identified in the present study can be considered  
142 novel, we compared all study-wide significant pQTLs with previously reported pQTL studies  
143 (Table S5), including the recent exome array analysis of the AGES cohort<sup>20</sup>. Of the 4,113  
144 independent associations detected in the current study, 1,527 (37.1%) are considered novel  
145 based on this comparison (Supplementary Note 1, Fig. 1E, Fig. S4). Of the 2,087 independent  
146 genetic signals, 821 (39.3%) are novel, in the sense that they have not been reported to  
147 associate with any protein, and we find new protein associations for 206 known signals. Out of  
148 the 2,099 proteins, 172 (8.2%) had no previously reported genetic associations in the  
149 comparison and we identified new genetic associations for additional 911 proteins.

150 We evaluated how well independent pQTLs reported by the INTERVAL study<sup>9</sup> (n =  
151 3,301) replicated in our results and found 75.6% to be both directionally consistent and  
152 nominally significant ( $P < 0.05$ ) (Supplementary Note 2, Fig. S5-S6). This proportion furthermore  
153 increased to 93.9% when the *NLRP12* locus was excluded, a reported *trans* hotspot that did not  
154 replicate in the AGES cohort (Supplementary Note 2, Fig. S5-S6). This locus has in fact been  
155 identified as platform specific in a recent study<sup>21</sup> and was suggested to be related to white blood  
156 cell lysis during sample handling. We similarly performed a lookup of the independent study-

157 wide significant associations identified in the current study in the INTERVAL study summary  
158 statistics (Supplementary Note 2, Fig. S7). Of 2,716 associations with information in the  
159 INTERVAL study we find that 94.1% are directionally consistent and 82.0% were both  
160 directionally consistent and nominally significant ( $P < 0.05$ ). Of 668 associations defined as  
161 novel in our study (Supplementary Note 1) and with information available in the INTERVAL  
162 study, we again find a very high directional consistency between the two studies, or 89.8% of  
163 associations, and 62.9% are both directionally consistent and nominally significant ( $P < 0.05$ ) in  
164 the smaller INTERVAL study.

165 Finally, with more individuals genotyped we revisited the GWAS of the serum protein co-  
166 regulatory network<sup>8</sup>, now represented by the first two eigenproteins of each module, and find  
167 that almost all the network modules are under strong genetic control (Supplementary Note 3).

168

### 169 ***Characterization of proteins by genetic association profiles***

170 Taking advantage of the broad coverage of the protein measurements in our study, to determine  
171 which protein characteristics can provide additional insights into the observed differences in  
172 genetic profiles for the measured proteins we compared characteristics such as tissue-  
173 enhanced gene<sup>22</sup> and protein<sup>23</sup> expression and protein localization<sup>22</sup> for proteins with genetic  
174 signals to those without any detected genetic effect. Moreover, we analyzed loss-of-function  
175 (LoF) intolerance<sup>24</sup> and hub status in two types of protein networks, i.e. the InWeb protein-  
176 protein interaction (PPI) network<sup>25</sup> and the serum protein co-regulatory network<sup>8</sup>, but  
177 pathogenicity of DNA sequence variation and hub status of proteins in biological networks are  
178 well-known features used to study the extent of selection pressure in molecular evolution<sup>26,27</sup>.  
179 We find that proteins with study-wide significant genetic associations, specifically those acting in  
180 *cis*, are generally more likely to have tissue-specific gene and protein expression and are more  
181 often secreted compared to those with no detected genetic signals (Fig. 2A, Tables S6-S7).  
182 These results may indicate that that *cis*-pQTLs in serum to some extent mirror the regulation of  
183 protein secretion from solid tissues, whereas the serum level of proteins without *cis*-pQTLs may  
184 mainly be affected by other mechanisms. By contrast, proteins with *trans* only signals are  
185 enriched among transmembrane proteins (Fig. 2A, Tables S6-S7). Furthermore, we find that  
186 proteins with *cis* signals generally have lower LoF intolerance, that is they are more tolerant to  
187 deleterious mutations, and they tend to have lower hub status in both PPI and co-regulatory  
188 networks, indicating a more peripheral position of *cis* regulated proteins in protein networks (Fig.  
189 2B, Tables S6-S7). Similarly, larger genetic effects on protein levels are negatively correlated



190 with LoF intolerance and hub status in both the PPI and co-regulatory networks (Fig. S8). This  
191 suggests that selective pressure may to some extent explain the lack of pQTLs for proteins that  
192 are encoded by housekeeping genes, are network hubs and are intolerant to LoF mutations.

193 Proteins with *trans* acting signals had higher hub status in the co-regulatory network  
194 compared to those proteins having no genetic signals (Fig. 2B). However, *trans* signals were not  
195 associated with hub status in the PPI network or influenced by LoF intolerance (Fig. 2B).  
196 Complementing this observation, we find that hub proteins in co-regulatory networks are  
197 generally connected to more proteins through the same genetic variants (Fig. S8). As the co-  
198 regulatory network is derived from protein correlations, these results highlight how its structure  
199 is to some extent shaped by genetic variants affecting multiple proteins, the majority of which  
200 are *trans* regulated<sup>8</sup> (Supplementary Note 3). These results elucidate key differences between  
201 the PPI and the serum protein co-regulatory networks, i.e. while hubs in both types of networks  
202 are depleted for *cis*-pQTLs, only those in the co-regulatory network were more likely *trans*-  
203 regulated proteins.

204

### 205 **Colocalization of pQTLs with GWAS risk loci**

206 Genetic effects on serum proteins may offer novel insights into mechanisms underlying the  
207 genetics of common disease and relevant traits. Therefore, we examined the overlap between  
208 pQTLs and GWAS loci. We obtained GWAS summary statistics for 81 diseases and clinical  
209 traits (Table S8) and identified all genome-wide significant ( $P < 5 \times 10^{-8}$ ) GWAS loci overlapping  
210 with a study-wide significant pQTL from our results. Of note, the number of significant loci for  
211 each of the tested phenotypes is highly dependent on the original study size (Fig. S9). GWAS  
212 signals for different phenotypes were considered to belong to the same locus if the lead variants  
213 were within 300kb of each other. By this criteria, 1,335 GWAS loci for 76 phenotypes were  
214 found to be in the vicinity of a study-wide significant pQTL and were tested for colocalization. Of  
215 those, 218 GWAS loci (associated with 69 phenotypes) had high support ( $PP4 > 0.8$ ) for  
216 colocalization with 1,045 proteins (Fig. 3, Tables S9-S10). Additionally, medium support  
217 ( $0.5 < PP4 \leq 0.8$ ) was found for colocalization between 171 proteins and 84 loci associated with  
218 49 phenotypes (Fig. 3, Tables S9-S10). Of the 799 loci associated with protein levels, 216  
219 (27.4%) colocalized with at least one GWAS phenotype and 1,083 (51%) of the 2,112 proteins  
220 with a study-wide significant pQTL. We found 91% (69/76) of the phenotypes tested to have a  
221 genetic signal colocalizing with at least one protein, with an average of 9 (11%) colocalized loci  
222 per trait (Fig. S10). GWAS loci with *cis*-pQTLs were more likely to colocalize (medium or high

223 support) with any protein than those without (22.3% vs 10.4%, Fisher's exact test  $P = 7.5 \times 10^{-8}$ ).  
224 For a given phenotype, we observed that its associated loci involved a median of 17 serum  
225 proteins (Fig. S11). Thus, even a limited proportion of associated loci for a given phenotype  
226 generally associates with numerous proteins in serum and consequently implicate multiple  
227 affected molecular pathways. To account for multiple independent signals in a given locus, we  
228 additionally ran a conditional colocalization analysis for loci that had more than one independent  
229 signal per protein, thus including 549 GWAS loci that overlapped with pQTLs for 546 proteins.  
230 Here we observed 178 instances of colocalization with medium or high support, of which 51  
231 (involving 19 loci, 14 phenotypes and 40 proteins) were not captured in the initial colocalization  
232 analysis (Tables S11-S12).

233 Colocalized *cis*-acting pQTLs can point to causal genes at GWAS loci. We found 237  
234 and 49 trait-locus-*cis*-protein combinations with high or medium support, respectively. For 102  
235 of 203 (50.2%) unique pairs of GWAS lead variants and colocalized *cis*-pQTLs, the protein was  
236 different than that encoded by the nearest gene to the GWAS lead variant (Table S10). For  
237 example, a GWAS signal for waist-to-hip ratio in the gene *LRRC36*, colocalizes with a pQTL for  
238 the serum levels of Agouti-related protein encoded by a nearby gene, *AGRP* (Fig. S12), a  
239 neuropeptide that increases appetite and decreases metabolism<sup>28</sup>. A related example involves  
240 two loci associated with BMI, located 5Mb apart on chromosome 20, both of which colocalize  
241 with serum levels of the Agouti signaling protein (*ASIP*) (Fig. S13), known to promote obesity via  
242 the melanocortin receptor (*MC4R*)<sup>29</sup>. These two associations are 2.2Mb and 7.6Mb upstream of  
243 the *ASIP* gene, respectively, however the colocalization with serum levels of *ASIP* suggest this  
244 may in fact be the causal candidate mediating their effects. Among neurological phenotypes,  
245 colocalized *cis*-pQTL examples include a GWAS signal for bipolar disorder on chromosome 2,  
246 which colocalizes with the serum levels of the protein encoded by *LMAN2L* (Fig. S14), and a  
247 signal for major depression disorder on chromosome 7 colocalizing with *TMEM106B* (Fig. S14),  
248 adding support for these being the causal genes at these loci, both of which are also the nearest  
249 gene to the GWAS lead variant.

250 We observed several highly pleiotropic loci, where multiple phenotype signals  
251 colocalized with multiple protein signals (Fig. 4A). In fact, among the high ( $PP4 > 0.8$ ) and  
252 medium confidence ( $PP4 > 0.5$ ) colocalization results, the number of associated proteins per  
253 GWAS locus was positively correlated with the number of associated phenotypes (Spearman's  
254  $\rho = 0.50$ ,  $P = 9.9 \times 10^{-17}$ ). These pleiotropic loci included for example the *ABO* locus, best  
255 known for its role in determining the ABO blood groups, which was found to harbor eight



256 independent protein signals within a 28 kb region (chr 9, 136,127,268-136,155,127) (Table S4),  
257 where pQTLs for 63 proteins colocalized with 17 phenotypes, predominantly cardiometabolic  
258 and hematopoietic (Fig. 4A, Table S10). The complex genetic architecture at this locus gives  
259 rise to a wide range of downstream consequences, as indicated by the distinct sets of proteins  
260 associated with each independent genetic signal defined here and consistent with previous  
261 reports<sup>10</sup>, and most traits associated with the locus are affected by more than one of those  
262 signals. The 63 proteins in the *ABO* locus were enriched for gene ontology terms and pathways  
263 such as “transmembrane signaling receptor activity” (FDR =  $2.7 \times 10^{-6}$ ), “regulation of cell  
264 migration” (FDR =  $2.5 \times 10^{-4}$ ) and “Hippo-Merlin signaling dysregulation” (FDR =  $1.2 \times 10^{-3}$ ).  
265 Another example of a pleiotropic locus is a 46 kb window (chr 19, 49,206,108-49,252,151),  
266 harboring variants adjacent to or within *FUT2* that are associated with diverse traits (Fig. 4B,  
267 Table S10), including immune (Crohn’s disease and type 1 diabetes), anthropometric (waist-to-  
268 hip ratio and offspring birth weight), cardiometabolic (blood pressure, LDL and total cholesterol)  
269 and renal (BUN and UACR). *FUT2* encodes for fucosyltransferase-2 that synthesizes the H  
270 antigen in body fluids and the intestinal mucosa, while a nearby gene, *FGF21*, is an important  
271 metabolic regulator<sup>30</sup>, acting for example through its effects on sugar intake<sup>31</sup>. We find that the  
272 genetic signals for 10 phenotypes in this region colocalize with 19 proteins that are collectively  
273 enriched for elevated gene expression<sup>22</sup> in the intestine (FDR =  $1.4 \times 10^{-6}$ ), salivary gland (FDR =  
274  $1.7 \times 10^{-6}$ ) and stomach (FDR =  $8.9 \times 10^{-3}$ ) (Fig. 4B-C) and include proteins involved in  
275 carbohydrate digestion (LCT), taste perception (LPO, PIP) or humoral immunity (CCL25). The  
276 proteins regulated by this locus thus suggest downstream effects across different parts of the  
277 gastrointestinal tract. The shared genetic architecture of immune disorders has been well  
278 documented in the literature and is mirrored in multiple colocalized pQTLs shared between  
279 various immune diseases (Fig. S15). In particular the *SH2B3* locus on chromosome 12 stands  
280 out in this regard, with GWAS signals for seven immune disorders colocalizing with three *trans*-  
281 regulated proteins (THPO, ICAM2, CXCL11), all involved in positive regulation of immune  
282 system processes (GO:0002684).

283         In some cases we observed more than one colocalized *trans*-pQTLs converging on the  
284 same protein for a given phenotype. For example, HDL-associations in the *LIPC* (chromosome  
285 15) and *APOB* (chromosome 2) loci both colocalized with the serum levels of the sodium-  
286 coupled transporter SLC5A8 (Fig. S16), involved in the transport of monocarboxylates such as  
287 lactate and short-chain fatty acids. Similarly, variants in the *GALNT2* (chromosome 1) and  
288 *GCKR* loci (chromosome 2) both regulate the serum levels of NRP1, colocalizing with GWAS

289 signals for triglyceride levels (Fig. S17). A more extreme example is a network of 12 loci with  
290 GWAS signals for platelet counts that colocalize with serum levels of 24 proteins (Fig. S18).  
291 These proteins include noggin (NOG) and cochlin (COCH), colocalizing with platelet count  
292 signals in five and four loci, respectively.

293

#### 294 ***Associations of proteins with phenotypes in the AGES cohort***

295 Taking advantage of the deep phenotyping of the AGES cohort, we examined direct  
296 associations between colocalized proteins and 37 phenotypes that were measured in the AGES  
297 cohort (Table S13). For a quarter (10/37) of the phenotypes tested we observed a significant  
298 enrichment of phenotype associations among the sets of colocalized proteins compared to  
299 randomly sampled proteins (Fig. 5, Fig. S19, Table S14), demonstrating more generally that  
300 GWAS loci for complex phenotypes regulate serum proteins that themselves are often directly  
301 associated to the phenotype itself. At a more relaxed genome-wide significant ( $P < 5 \times 10^{-8}$ )  
302 threshold for pQTLs, the proportion of phenotypes with significant enrichment of protein  
303 associations increased to 45% (18/40 phenotypes, Fig. S20), likely due to an increase in  
304 statistical power with more colocalized proteins per phenotype at this threshold and indicating  
305 that more associations between proteins regulated by GWAS-loci and the respective  
306 phenotypes can be expected to be identified as sample sizes for proteogenomic studies  
307 increase. Among the diseases and clinical traits with the strongest enrichment for direct protein-  
308 trait associations, we found age-related macular degeneration (14% of colocalized proteins  
309 associated compared to an average of 7% for random proteins,  $P < 0.001$ ), total cholesterol (67%  
310 vs 35% for random,  $P < 0.001$ ), Alzheimer's disease (21% vs 1% for random,  $P = 0.001$ ) and type  
311 2 diabetes (60% vs 40% for random,  $P = 0.017$ ). In some cases, this enrichment was driven by  
312 proteins regulated from a few *trans* loci, as evident by the loss of significance when the analysis  
313 was repeated without pleiotropic loci regulating five or more proteins, leaving on average 17  
314 proteins per trait (Fig. 5, Table S14). This was particularly evident for Alzheimer's disease,  
315 where the enrichment was entirely driven by the associations of proteins regulated by the *APOE*  
316 locus (Table S13). In other cases, the removal of proteins regulated by pleiotropic loci resulted  
317 in an enhanced enrichment of phenotype associations, such as for HbA1c, mean platelet  
318 volume and diastolic blood pressure (Fig. S19, Table S14).

319 By evaluating each individual locus separately, we identified six loci with significant  
320 phenotype-association enrichment among its linked proteins that colocalized with GWAS signals  
321 for the respective phenotype, thus demonstrating specific examples of genetic variants whose

322 molecular and phenotypic consequences are linked within the same cohort (Table S15). Here  
323 the *APOE* locus stood out in terms of number of enriched phenotypes, with its regulated  
324 proteins being enriched for associations with Alzheimer's disease, age-related macular  
325 degeneration, numerous cardiometabolic traits including coronary artery disease. The 641  
326 proteins regulated by the *VTN* locus on chromosome 17 were also enriched for associations  
327 with AMD. The *PSRC1-CELSR2-SORT1* locus, best known for its associations with coronary  
328 artery disease and cholesterol levels, showed enrichment for protein associations with bone  
329 mineral density. Proteins regulated by the *ABO* locus on chromosome 9 and the *UGT* gene  
330 family cluster on chromosome 8 were enriched for associations with total cholesterol and finally  
331 the proteins regulated by the *ZFPM2* locus on chromosome 8 were enriched for associations  
332 with basophil counts. These genetic loci thus demonstrate specific examples whose molecular  
333 and phenotypic consequences are linked within the same cohort.

334 Other examples of colocalized proteins showing significant associations with the  
335 respective phenotype include the inhibin beta subunit B (INHBB) protein, which has a *cis*-pQTL  
336 on chromosome 2 and a *trans*-signal on chromosome 12, near the *INHBC* gene that encodes  
337 another subunit of the same protein complex, both of which colocalize with GWAS signals for  
338 estimated glomerular filtration rate (eGFR), a marker of renal function (Fig. 6A-C). The INHBB  
339 protein itself is associated with eGFR in the AGES cohort in a directionally consistent manner  
340 (Fig. 6C-D). Thus, the associations of these genetic variants affecting different components of  
341 the same protein complex together with the consistent association between the protein itself and  
342 eGFR indicate a possible role for the inhibin/activin proteins in renal function. Another example  
343 is the colocalization between a GWAS signal for type 2 diabetes with the missense lead variant  
344 rs738409 in the *PNPLA3* gene, a well established locus for non-alcoholic fatty liver disease<sup>32</sup>,  
345 and a *trans*-pQTL for ADP Ribosylation Factor Interacting Protein 2 (ARFIP2) (Fig. 6E), which is  
346 strongly downregulated in type 2 diabetes patients in AGES (Fig. 6F)<sup>18</sup>. These observations  
347 raise a number of new questions, for example how a missense variant in *PNPLA3* leads to a  
348 change in the circulating levels of ARFIP2, if ARFIP2 provides some sort of readout of *PNPLA3*  
349 function and finally how ARFIP2 relates to type 2 diabetes, i.e. if it mediates any of the risk  
350 associated with this locus or if it is merely a bystander. Thus more generally, the novel links  
351 between genetic loci, proteins and disease risk observed here can be used to derive new  
352 hypotheses for further studies.

353

354

## 355 Discussion

356 In this work, we present the largest genome-wide association study of serum protein levels to  
357 date in terms of protein coverage, and demonstrate a substantial increase in existing knowledge  
358 as regards the number of significant genetic associations to proteins in circulation. We  
359 furthermore provide a systematic evaluation of protein-phenotype associations in the context of  
360 established risk loci for numerous diseases and clinical traits.

361 The current study expands on our previous work<sup>8</sup> by increasing the number of genetic  
362 variants included in the analysis (from *cis*-regions only to a genome-wide analysis), thus  
363 increasing the search space, but also enhancing statistical power for identifying genetic  
364 associations by increasing the sample size in genetic analyses from 3,219 previously to 5,368  
365 participants in the current study. Here, we identified study-wide significant genetic signals for  
366 half of the measured proteins and up to 16 independent genetic signals for a given protein.  
367 Thus, as for any other traits, the expected number of genetic associations for serum proteins  
368 can only be expected to increase with larger sample sizes, as has been demonstrated for  
369 CRP<sup>33</sup>. Large-scale meta-analyses across cohorts and biobanks will with time provide a more  
370 complete understanding of the genetic regulation of individual circulating proteins and their  
371 networks, including the effect of variability between different tissues on serum protein levels.  
372 The majority of *cis* and *trans* acting pQTLs detected in serum and plasma can be readily  
373 replicated across different populations, as shown in the current study, and different proteomic  
374 platforms<sup>8,9,17,21</sup>. However, a recent cross-platform comparison has shown that a subset of  
375 pQTLs are platform-specific and may in some cases represent epitope effects or other technical  
376 factors<sup>21</sup>. Thus, meta-analyses across platforms will still need to consider differences in  
377 analytical approaches and in cases where protein quantifications obtained by orthogonal  
378 methods differ, *cis*-pQTLs and mass spectrometry validation of probe targets may be good  
379 indicators of platform specificity<sup>34</sup>.

380 We demonstrate that proteins that are secreted, tissue-specific, more tolerant to LoF  
381 variants and with few connections in protein networks were most likely to be genetically  
382 controlled. This pattern was mainly driven by *cis* acting signals and not as apparent for the *trans*  
383 effects on protein levels, illustrating that *cis*- and *trans*-signals for serum proteins arose by  
384 different means and may differ in evolutionary properties. Our results are consistent with the  
385 notion that evolutionary important, and likely disease-relevant, genes undergo a negative  
386 selection against genetic *cis*-variants, which has been proposed as an explanation of the  
387 extreme polygenicity of complex traits<sup>35</sup>. The observed depletion of *cis*-variants among network

388 hubs in our study are furthermore in line with the recently proposed omnigenic model<sup>2</sup>, which  
389 suggests that core disease genes are rarely affected directly by GWAS variants but rather  
390 through a multitude of smaller effects mediated through *cis*-regulation of peripheral genes in  
391 regulatory networks. Thus, while our results provide a map of *cis*-regulatory effects for 812  
392 proteins, linking many of these to disease signals from GWAS studies, those without *cis*-effects  
393 may be even more important in the context of disease and should be studied further by other  
394 means. While hubs in the PPI network were depleted for any genetic signal, *trans* affected  
395 proteins showed higher degree of connectivity in the co-regulatory network compared to those  
396 with no detectable genetic signal. These findings demonstrate that the structure of the co-  
397 regulatory network is to some extent be driven by genetic variants affecting multiple proteins.  
398 We also note that unlike PPI networks constructed in solid tissues, the serum protein networks  
399 are composed of protein members synthesized across different tissues of the body and as such  
400 may reflect cross-tissue regulation<sup>8</sup> or factors that affect the levels of circulating proteins  
401 independently of their origin.

402         Among proteins with genetic associations, we find that many have multiple genetic  
403 signals, both across different loci throughout the genome but also within a given locus as  
404 revealed by conditional analysis, indicating that allelic heterogeneity is common in loci  
405 regulating serum protein levels. Widespread allelic heterogeneity has been described for gene  
406 expression<sup>36</sup> and complex traits in general<sup>37</sup>. For serum proteins, this may reflect the complex  
407 regulation and diverse origin of proteins in circulation, as these proteins may arise from almost  
408 any tissue of the body. Furthermore, *cis*-pQTLs show a roughly 40% overlap with gene  
409 expression QTLs<sup>8,9</sup>, suggesting that a large fraction of the genetic effect is mediated through  
410 any of the many post-transcriptional steps involved in protein maturation.

411         The integration of well-established genetic associations for 81 diseases and disease-  
412 related traits revealed a profound overlap with the genetic signals affecting protein levels in our  
413 study, where a third of the identified loci regulating serum protein levels colocalized with at least  
414 one GWAS phenotype. We identify examples of disease-associated loci colocalizing with many  
415 proteins, especially loci that also exhibit pleiotropic phenotype associations. Thus, it seems  
416 likely that the more complex the molecular consequences of a variant, the more likely it is to be  
417 associated with many different phenotypes, which has also been observed at the transcriptomic  
418 level<sup>38</sup>. The serum protein changes associated with any given disease signal can shed new light  
419 on the underlying pathways that are affected either before or after the onset of disease. The  
420 deep phenotyping of the AGES cohort allowed for an integrative analysis of genetic variants,

421 serum protein measurements and phenotypes within the same population. For proteins  
422 regulated by loci linked to a given disease-relevant phenotype, we observed an enrichment for  
423 associations to the same phenotype measures in our cohort, thus pointing to many novel  
424 candidate proteins that may play a role in regulating or responding to these phenotypes.  
425 However, it should be noted that while a pQTL that colocalizes with a signal for a disease or  
426 clinical trait may implicate causal candidates for mediating the genetic risk, it may just as well  
427 indicate downstream events or even unrelated parallel effects of a pleiotropic variant.  
428 Furthermore, the plasma proteome has been shown to change in waves throughout the human  
429 lifespan<sup>39</sup>, with a large proportion of proteins changing in old age. Thus some of the  
430 associations observed in the elderly AGES cohort may not be directly transferable to a younger  
431 population, but may at the same time shed light on the physiological relevance of circulating  
432 proteins in the aging process. Our study provides genetic instruments for further studies of  
433 causal relationships for specific examples, however mechanistic and experimental studies are  
434 warranted for determining the underlying chains of events behind these complex associations.  
435 Our results offer an in-depth inventory of information regarding the interconnections between  
436 genetic variants, serum proteins and disease relevant traits, which may encourage discoveries  
437 of novel therapeutic targets and fluid biomarkers, providing a robust framework for  
438 understanding the pathobiology of complex disease.

439

440

## 441 **Methods**

442

### 443 *The AGES cohort*

444 Cohort participants aged 66 through 96 were included from the AGES-Reykjavik Study<sup>40</sup>, a  
445 prospective study of deeply phenotyped individuals of Northern European ancestry (Table S1).  
446 Blood samples were collected at the baseline visit after overnight fasting and serum lipids,  
447 glucose, HbA1c, insulin, uric acid and urea measured using standard protocols. LDL and total  
448 cholesterol levels were adjusted for statin use, with an approach similar to what has previously  
449 been described<sup>41</sup>. Hypertension medication use was accounted for by adding 15 mmHG to  
450 systolic blood pressure and 10 mmHG to diastolic blood pressure<sup>42</sup>. Serum creatinine was  
451 measured with the Roche Hitachi 912 instrument and estimated glomerular filtration rate (eGFR)  
452 derived with the four-variable MDRD Study equation<sup>43</sup>. Type 2 diabetes was defined from self-  
453 reported diabetes, diabetes medication use or fasting plasma glucose  $\geq 7$  mmol/L. Type 2



454 diabetes patients were excluded from all analyses for fasting glucose, fasting insulin and  
455 HbA1c. Coronary artery disease was determined using hospital records and/or cause of death  
456 registry data. A coronary artery disease event was any occurrence of myocardial infarction, ICD-  
457 10 codes: I21-I25, coronary revascularization (either CABG surgery or percutaneous coronary  
458 intervention (PCI)) or death from CHD according to a complete adjudicated registry of deaths  
459 available from the national mortality register of Iceland (ICD-10 codes I21–I25). Prostate cancer  
460 diagnosis was obtained from medical records (ICD-10 code C61). Information on migraine,  
461 Parkinson’s disease, eczema and thyroid disease was obtained from questionnaires.  
462 Alzheimer’s disease was determined with a consensus diagnosis based on international  
463 guidelines was made by a panel that includes a geriatrician, neurologist, neuropsychologist, and  
464 neuroradiologist and defined according to the criteria of the National Institute of Neurological  
465 and Communicative Disorders and Stroke and the Alzheimer’s Disease and Related Disorders  
466 Association (NINCDS-ADRDA), as previously described<sup>44</sup>. Hospital- and mortality data was also  
467 used to identify cases according to the ICD-10 code F00. Age-related macular degeneration  
468 (AMD) in the AGES-Reykjavik study has been previously described<sup>45</sup>, but in short was defined  
469 by the presence of any soft drusen and pigmentary abnormalities (increased or decreased  
470 retinal pigment) or the presence of large soft drusen  $\geq 125\mu\text{m}$  in diameter with a large drusen  
471 area  $>500\mu\text{m}$  in diameter or large  $\geq 125\mu\text{m}$  indistinct soft drusen in the absence of signs of late  
472 AMD. Maximum grip strength of the dominant hand was measured by a computerised  
473 dynamometer, as previously described<sup>46</sup>. Bone mineral density was estimated from a CT scan  
474 of the femur<sup>47</sup>. The AGES-Reykjavik study was approved by the NBC in Iceland (approval  
475 number VSN-00-063), and by the National Institute on Aging Intramural Institutional Review  
476 Board, and the Data Protection Authority in Iceland. All participants provided informed consent.

477

#### 478 *Protein measurements*

479 Serum levels of 4,135 human proteins, targeted by 4,782 SOMAmers<sup>48</sup>, were determined at  
480 SomaLogic Inc. (Boulder, US) in samples from 5,457 AGES-Reykjavik participants as previously  
481 described<sup>8</sup>. A few SOMAmers are annotated to more than one gene, for example when the  
482 target is a protein complex, thus the 4,782 SOMAmers are annotated to a total of 4,118 unique  
483 targets (annotated as one or more Entrez gene symbols) in the most up to date inhouse  
484 annotation database, which were used in all analyses. Sample collection and processing for  
485 protein measurements were randomized and all samples run as a single set. The SOMAmers  
486 that passed quality control had median intra-assay and inter-assay coefficient of variation (CV)  
487  $<5\%$  similar to that reported on variability in the SOMAscan assays<sup>49</sup>. In addition to multiple

488 types of inferential support for SOMAmer specificity towards target proteins including cross-  
489 platform validation and detection of *cis*-acting genetic effects<sup>8</sup>, direct measures of the SOMAmer  
490 specificity for 779 of the SOMAmers in complex biological samples was performed using  
491 tandem mass spectrometry<sup>8</sup>. Previous studies have shown that pQTLs replicate well across  
492 proteomics platforms<sup>8,9</sup>. While a recent comparisons of protein measurements across different  
493 platforms showed a wide range of correlations<sup>21,34</sup>, *cis* pQTLs and validation by mass  
494 spectrometry were predictive of a strong correlation across platforms and are likely good  
495 indicators of platform specificity when protein concentrations obtained by orthogonal methods  
496 differ<sup>34</sup>. Hybridization controls were used to correct for systematic variability in detection and  
497 calibrator samples of three dilution sets (40%, 1% and 0.005%) were included so that the  
498 degree of fluorescence was a quantitative reflection of protein concentration. In the main text  
499 the results are described at a protein level instead of SOMAmer level, to avoid overcounting as  
500 some proteins are targeted by more than one SOMAmer that were selected to different forms or  
501 domains of the same protein. Thus, when we refer to a protein having a genetic signal, this  
502 indicates that any of the protein's SOMAmers are associated with that genetic signal.

503

#### 504 *Genotyping and imputation*

505 Within the AGES cohort, 3,219 individuals were genotyped with the Illumina hu370CNV array  
506 and 2,705 individuals genotyped with the Illumina Infinium Global Screening Array. Data from  
507 both genotype arrays underwent quality control procedure, separately, removing variants with  
508 call rate < 95% and HWE p-value <  $1 \times 10^{-6}$ . Both arrays were imputed against the Haplotype  
509 Reference Consortium imputation panel r1.1 with the Minimac3 software<sup>50</sup>. Post-imputation  
510 quality control consisted of filtering out variants with imputation quality  $R^2 < 0.7$ , MAF < 0.01, as  
511 well as monomorphic and multiallelic variants for each platform separately. Genotypes for  
512 remaining variants, with matching location and alleles between platforms, were merged to  
513 create a dataset with 7,506,463 variants for 5,656 individuals (268 individuals were genotyped  
514 on both platforms, with a 99% match of genotypes for the final set of variants between  
515 platforms). The quality control procedure was performed using bcftools (v1.9)<sup>51</sup> and PLINK  
516 1.9<sup>52</sup>. All positions are based on genome assembly GRCh37.

517

#### 518 *GWAS and conditional analysis*

519 Box-Cox transformation was applied on the protein data<sup>53</sup> and extreme outlier values were  
520 excluded, defined as values above the 99.5th percentile of the distribution of 99th percentile

521 cutoffs across all proteins after scaling, resulting in the removal of an average 11 samples per  
522 SOMAmer, as previously described<sup>18</sup>. Within the AGES cohort, 5,368 individuals had both  
523 genetic data and protein measurements. With that sample set, 7,506,463 variants were tested  
524 for association with each of the 4,782 SOMAmers separately, in a linear regression model with  
525 age, sex, 5 genetic principal components and genotyping platform as covariates using PLINK  
526 2.0. To obtain independent genetic signals, we performed a stepwise conditional association  
527 analysis for each SOMAmer separately with the GCTA-COJO software<sup>54,55</sup>. We conditioned on  
528 the current lead variant, defined as the variant with the lowest p-value, and then kept track of  
529 any new lead variants with study-wide-significant associations. Variants in strong LD ( $r^2 > 0.9$ )  
530 with previously chosen lead variants were not considered for joint analysis to avoid  
531 multicollinearity. Associations with independent lead variants within 300kb window of the gene  
532 boundaries of the protein-coding gene were defined as *cis*-signals, and otherwise in *trans*. To  
533 compare independent signals between SOMAmers, we define any signals with lead variants in  
534 strong LD ( $r^2 > 0.9$ ) as the same signal. Due to the complex LD structure and high pleiotropy of  
535 the MHC region<sup>56</sup> (chr.6, 28.47-34.45Mb) we collapsed all signals within that region to a single  
536 signal. To define loci harboring independent signals, we defined a 300 kb window around each  
537 independent signal (150 kb up- and downstream of lead variants) and collapsed all such  
538 intersecting windows. Therefore, the definition of loci is solely based on physical distances while  
539 the definition of independent signals is solely based on LD structure. The GWAS results were  
540 visualised using Circos<sup>57</sup>. Pathway enrichment was performed using gProfiler<sup>58</sup>, using the full  
541 set of measured proteins as background and considering Benjamini-Hochberg FDR<0.05 as  
542 statistically significant. Enrichment of tissue-elevated gene expression was performed using  
543 data from the Human Protein Atlas<sup>59</sup> with a Fisher's exact test, considering Benjamini-Hochberg  
544 FDR<0.05 as statistically significant.

545

#### 546 *Comparison with previous proteogenomic studies*

547 To evaluate the novelty of the genetic associations identified in the current study, we compared  
548 our results to 20 previously published proteogenomic studies (Supplementary Table 5),  
549 including the protein GWAS in the INTERVAL study<sup>9</sup>, our previously reported genetic analysis of  
550 3,219 AGES cohort participants<sup>8</sup>, and a recent Illumina exome array analysis in 5,343 AGES  
551 participants<sup>20</sup>. In a previous proteogenomic analysis of AGES participants<sup>8</sup>, one *cis* variant was  
552 reported per protein using a locus-wide significance threshold, as well as *cis*-to-*trans* variants at  
553 a Bonferroni corrected significance threshold, whereas the more recent exome-array analysis<sup>20</sup>  
554 reported results at a study-wide significant threshold ( $P < 1 \times 10^{-10}$ ). Due to these differences in

555 reporting criteria, we only considered the associations in previous AGES results that met the  
556 current study-wide p-value threshold ( $P < 1.046 \times 10^{-11}$ ). For all other studies we retained the  
557 pQTLs at the reported significance threshold. In addition, we performed a lookup of all  
558 independent pQTLs from the current study available in summary statistics from the INTERVAL  
559 study, considering them known if they reached a study-wide significance in their data. We  
560 calculated the LD structure between the reported significant variants for all studies, using 1000  
561 Genomes v3 EUR samples, but using AGES data when comparing to previously reported AGES  
562 results. We considered variants in LD ( $r^2 > 0.9$  for consistency for defining signals across  
563 SOMAmers described above, but results for  $r^2 > 0.5$  are additionally shown in Supplementary  
564 Note 1) to represent the same signal across studies. Comparison was performed on protein  
565 level, by matching the reported Entrez gene symbol from each study.

566

### 567 *Enrichment analysis*

568 We grouped the proteins into three categories derived from our GWAS results; a) proteins with  
569 at least one *cis* signal, b) proteins with no *cis* signals and at least one *trans* signal and c)  
570 proteins with no genetic signal. From our data we also derived three continuous traits for a given  
571 protein; a) number of associated independent signals, b) highest absolute beta coefficient of all  
572 associated signals and c) number of proteins that share genetic signals with the given protein,  
573 which is essentially a quantitative representation of whether a protein is a part of a *trans*  
574 hotspot. We fetched publicly available data regarding; a) tissue elevated gene expression,  
575 where “Tissue Enriched” in our analyses refers to the “Tissue Enriched”, “Tissue Enhanced” or  
576 “Group Enriched” categories defined by Uhlen et al.<sup>22</sup>, b) tissue elevated protein expression,  
577 where “Tissue Enriched” in our analyses refers to the “Tissue Enriched”, “Tissue Enhanced” or  
578 “Group Enriched” categories defined by Wang et al.<sup>23</sup>, c) annotation of secreted and  
579 transmembrane proteins, classifying proteins as secreted or transmembrane if it was predicted  
580 so by at least one method or one segment, respectfully<sup>22</sup>, d) gene-level loss-of-function  
581 intolerance<sup>24</sup> and e) network degree in the InWeb protein-protein interaction network<sup>25</sup>.  
582 Furthermore, we estimated hub status of proteins within the serum protein co-regulation network  
583 derived from the AGES cohort<sup>8</sup>. Protein classifications were compared using a Fisher’s exact  
584 test, where the estimate is the odds ratio. Continuous parameters were compared between  
585 protein classes using the Wilcoxon Rank Sum test and for the estimate we calculated the  
586 median of the difference between values from the two classes, so the size of the estimate is  
587 dependent on the scale of the values. For comparing two continuous traits we used Spearman’s  
588 Rho correlation. We report 95% confidence intervals of all estimates.

589

### 590 *GWAS colocalization analysis*

591 We included 81 phenotypic traits including major disease classes in the colocalization analysis,  
592 for which GWAS summary statistics were publicly available from consortium websites and the  
593 GWAS catalog<sup>60</sup>. We restricted the study selection to those with study sample sizes of  $n > 10K$ ,  
594 of primarily European Ancestry (to match the AGES cohort's LD structure), having at least one  
595 genome-wide significant association ( $P < 5 \times 10^{-8}$ ) and selecting one study per phenotype (Table  
596 S8). For each trait, significant loci were defined by identifying all genome-wide variants  
597 ( $P < 5 \times 10^{-8}$ ) at least 500kb apart, defining a flanking region of 1 Mb around each lead variant and  
598 finally merging overlapping regions. For each GWAS locus, all SOMAmers with a study-wide  
599 significant association (*cis* or *trans*) within the given region were tested for colocalization, if at  
600 least 50 SNPs in the region had complete information from both trait and protein GWAS. When  
601 the MAF was not available for a given GWAS, the 1000 Genomes EUR MAF was used instead.  
602 Colocalization analysis was performed with *coloc* (v.3.2-1)<sup>61</sup>, using the *coloc.abf* function with  
603 default priors. High and medium colocalization support was defined as  $PP.H4 > 0.8$  and  
604  $PP.H4 > 0.5$ , respectively. Conditional colocalization analysis was performed using *coloc* 4.0-4<sup>62</sup>,  
605 using the “allbutone” option and restricted to loci harboring more than one independent signal  
606 per protein. Unlike the primary *coloc* analysis, the conditional analysis requires the GWAS effect  
607 size to be included, thus the phenotypes AMD, ATD and PD were excluded from this analysis  
608 which did not have this information available in the GWAS summary statistics. Results were  
609 visualized with LocusCompare<sup>63</sup>.

610

### 611 *Phenotype associations*

612 For each GWAS phenotype with a corresponding measurement in AGES and well represented  
613 at the population level (Table S8), the colocalized proteins were tested for association with the  
614 phenotype in all AGES participants with protein data available ( $n = 5,457$ , see *n* missing per  
615 phenotype in Table S1), in a linear or logistic regression model adjusted for age and sex. The  
616 SOMAmer with the lowest P-value was chosen for each protein, and P-values were  
617 subsequently adjusted for the number of proteins tested for each trait by Benjamini-Hochberg  
618 FDR. For each phenotype with at least five colocalized proteins, the proportion of significantly  
619 associated proteins ( $FDR < 0.05$ ) was compared to that obtained by 1000 randomly sampled  
620 protein sets of the same size, again choosing the SOMAmer with the lowest P-value per protein,  
621 and an empirical P-value calculated. The analysis was repeated by excluding proteins  
622 originating from loci where five or more proteins colocalized with the same phenotype. The

623 same enrichment analysis was additionally performed for each individual locus where where  
624 five or more proteins colocalized with the same phenotype.

625

626

## 627 **Acknowledgements**

628 The authors thank the staff of the Icelandic Heart Association for their contribution to AGES-  
629 Reykjavik and all study participants for their invaluable contributions to this study.

630 The study was funded by Icelandic Heart Association contract HHSN271201200022C, National  
631 Institute on Aging contract N01-AG-12100, and Althingi (the Icelandic Parliament). V.E. and  
632 Va.G. are supported by the Icelandic Research Fund (IRF grants 195761-051, 184845-053 and  
633 206692-051) and Va.G. holds a postdoctoral research grant from the University of Iceland  
634 Research Fund.

635

## 636 **Author Contributions**

637 A.G., Va.G., V.E., and Vi.G designed the study. A.G., Va.G., G.T.A., E.F.G., B.G.J. and T.A.  
638 performed data analysis. J.R.L. and L.L.J. provided expertise on proteomics data and  
639 contributed to discussion. Vi.G. and V.E. supervised the project. A.G. and Va.G. wrote the first  
640 draft of the manuscript, with all coauthors contributing to data interpretation, manuscript editing,  
641 and revision.

642

## 643 **Declaration of Interests**

644 The study was supported by the Novartis Institute for Biomedical Research, and protein  
645 measurements for the AGES-Reykjavik cohort were performed at SomaLogic. J.R.L. and L.L.J.  
646 are employees and stockholders of Novartis. All other authors have no conflict of interests to  
647 declare.

648

## 649 **Data Availability**

650 The custom-design Novartis SOMAscan is available through a collaboration agreement with  
651 the Novartis Institutes for BioMedical Research ([lori.jennings@novartis.com](mailto:lori.jennings@novartis.com)). Data from the  
652 AGES Reykjavik study are available through collaboration ([AGES\\_data\\_request@hjarta.is](mailto:AGES_data_request@hjarta.is))  
653 under a data usage agreement with the IHA. All other data supporting the conclusions of the  
654 paper are presented in the main text and supplementary materials.

655



656 **Figures**

657

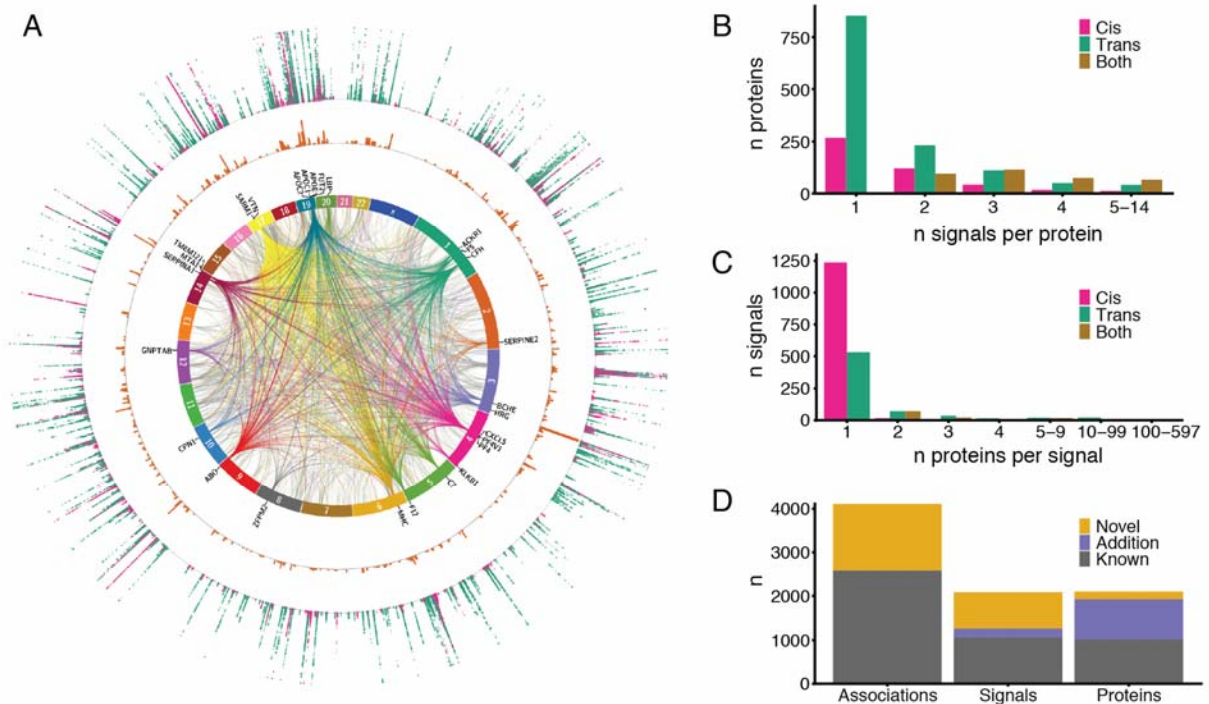

658

659 **Fig. 1 - A)** Circos plot showing every study-wide significant variant-protein association from the

660 protein GWAS (n = 5,368). The innermost layer shows links between independent signals and

661 *trans* gene locations of associated proteins. *Trans* hotspots are colored by the chromosome

662 they originate from. The second layer states the nearest genes to these *trans* hotspots. The

663 third layer is a histogram of the distribution of the independent signals, where each bar

664 represents the number of independent signals within 300kb from each other, values ranging

665 from 1 to 38. The outermost layer is a Manhattan plot for all proteins, P-values ranging from

666  $1 \times 10^{-11}$  to  $1 \times 10^{-300}$  (capped), colored by *cis* (pink) or *trans* (green). B) Barplot showing number

667 of proteins, binned by the number of associated independent signals, colored by *cis* (pink), *trans*

668 (green) or both (mustard). C) Barplot showing number of independent signals, binned by the

669 number of associated proteins, colored by *cis* (pink), *trans* (green) or both (mustard). D) Barplot

670 showing the number of novel associations compared to similar large-scale genotype-protein

671 association studies.

672

673

674

675

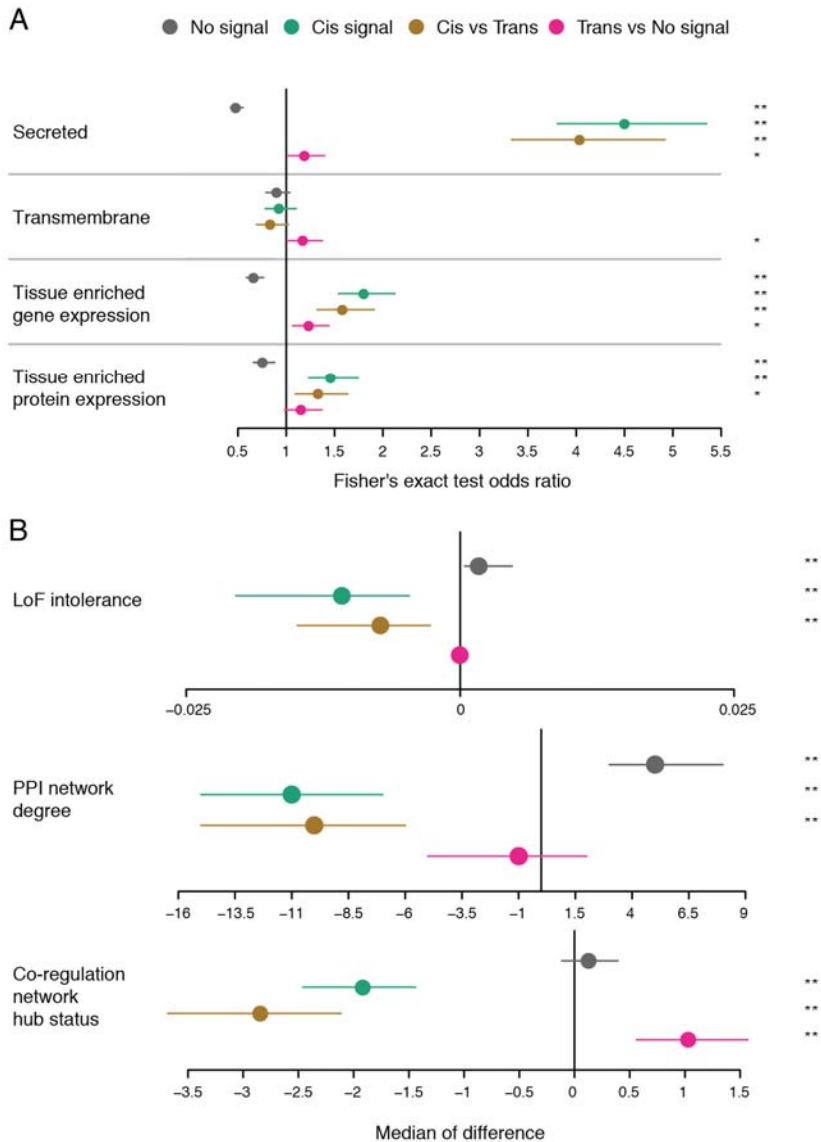

676

677 **Fig. 2** - Enrichment analysis estimates and 95% confidence intervals comparing characteristics  
 678 between proteins classified by types of genetic association signals. See main text for definitions.

679 A) Fisher's exact test for comparing classifications. B) Wilcoxon's rank sum test for comparing  
 680 classifications with continuous traits. The estimate and confidence interval represents the  
 681 median of the difference between values from the two classes. The stars on the right indicate  
 682 statistical significance; \*  $p < 0.05$ , \*\*  $p < 0.001$ .

683

684

685

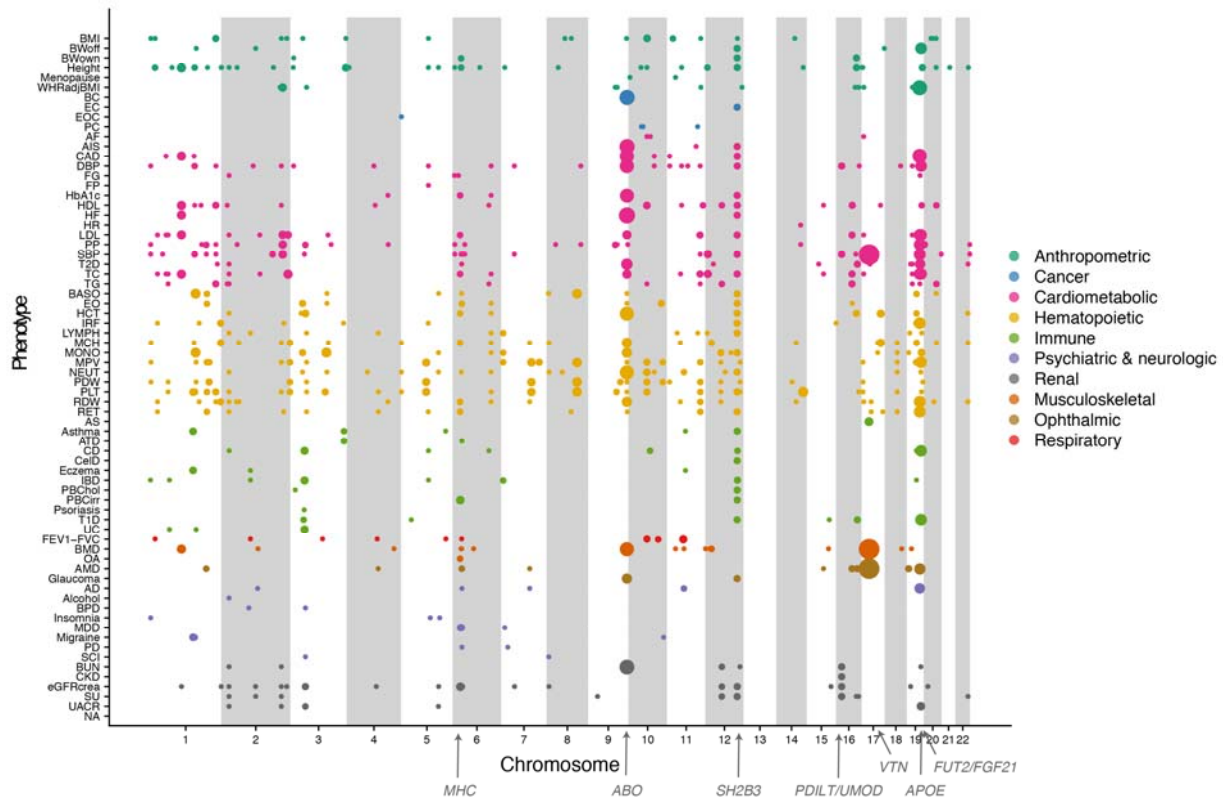

686  
 687 **Fig. 3** – Overview of colocalization between protein and phenotype associations across the  
 688 genome. Each dot represents a genetic locus (genomic location on x-axis) that is associated  
 689 with a phenotype (y-axis), where the dots size indicates the number of colocalized proteins  
 690 (coloc PP4>0.5). Phenotype abbreviations are available from Table S8.

691

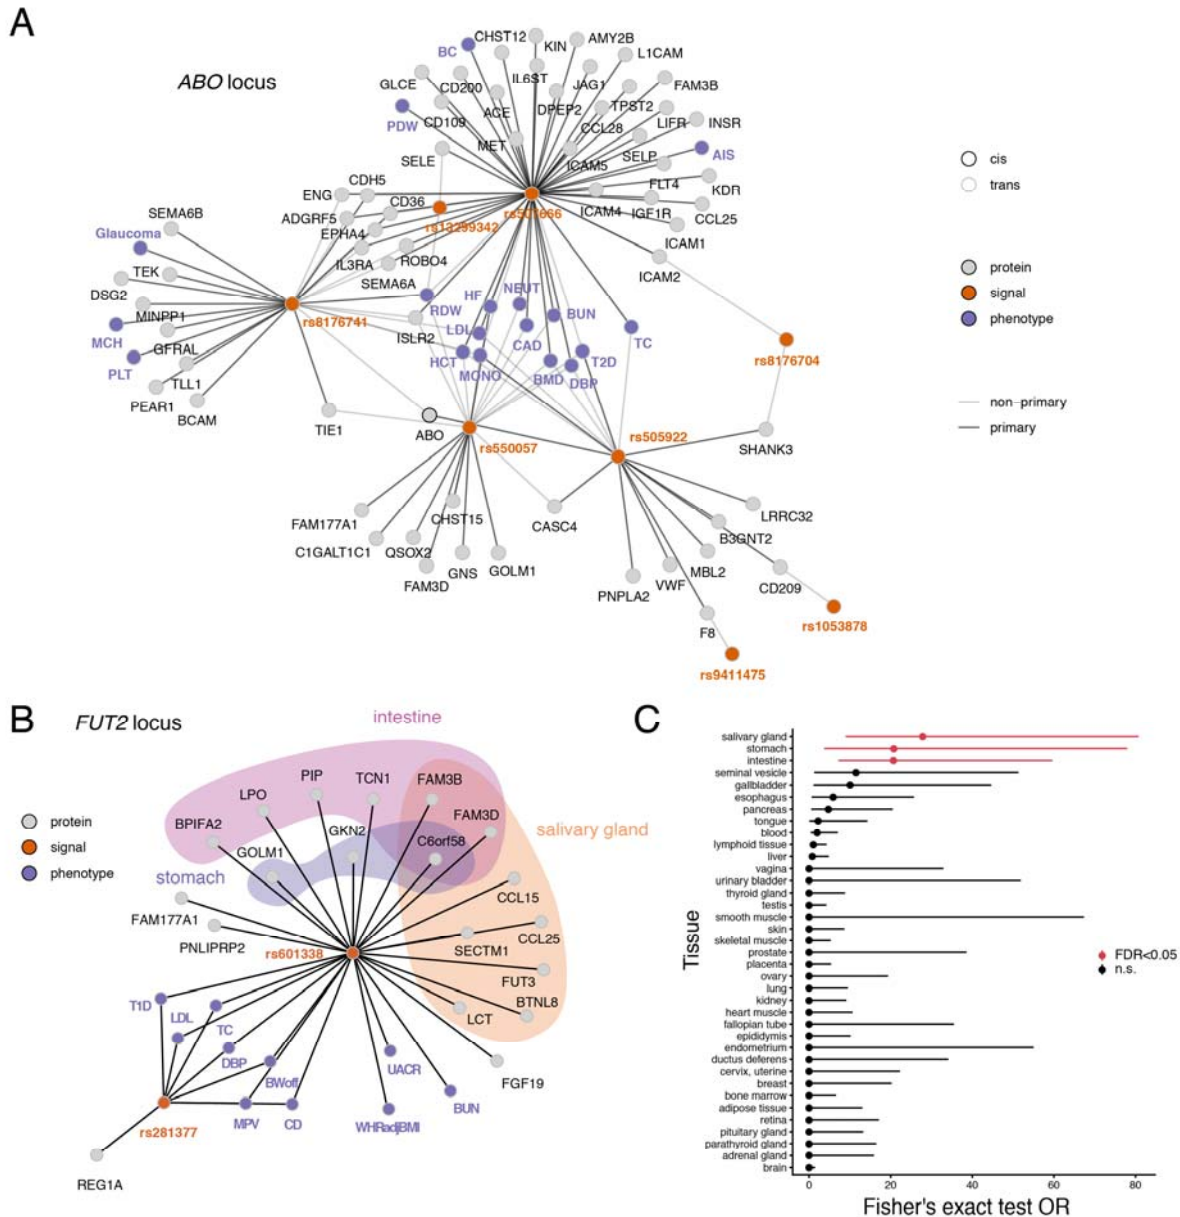

692

693

694 **Fig. 4 – A)** An overview of independent genome-wide significant genetic signals (orange  
 695 nodes), annotated by the SNP with the strongest protein association, at the *ABO* locus (chr 9,  
 696 136,127,268 – 136,155,127) and their links to proteins (grey nodes) and phenotypes (purple  
 697 nodes). Edges between genetic signals and proteins indicate primary (dark edges) and  
 698 secondary (light edges) independent signals from the conditional analysis. Edges between  
 699 genetic signals and traits indicate that any of the lead pQTL SNPs within that signal reaches  
 700  $P < 5 \times 10^{-8}$  in GWAS summary statistics for the given trait, and the primary signal is assigned for

701 the trait based on the lowest P-value. B) An overview of the independent genome-wide  
 702 significant genetic signals (orange nodes), annotated by the SNP with the strongest protein  
 703 association, at the *FUT2* locus (chr 19, 49,206,108 – 49,252,151) and their links to proteins  
 704 (grey nodes) and the phenotypes they colocalize with (purple nodes). The background color  
 705 indicates tissue-elevated expression in salivary gland, intestine or stomach. C) Enrichment  
 706 (Fisher's exact test) of tissue-elevated expression among the 19 proteins regulated by the *FUT2*  
 707 locus where Benjamini-Hochberg FDR<0.05 is considered significant (red). Phenotype  
 708 abbreviations are available from Table S8.

709  
 710  
 711  
 712  
 713

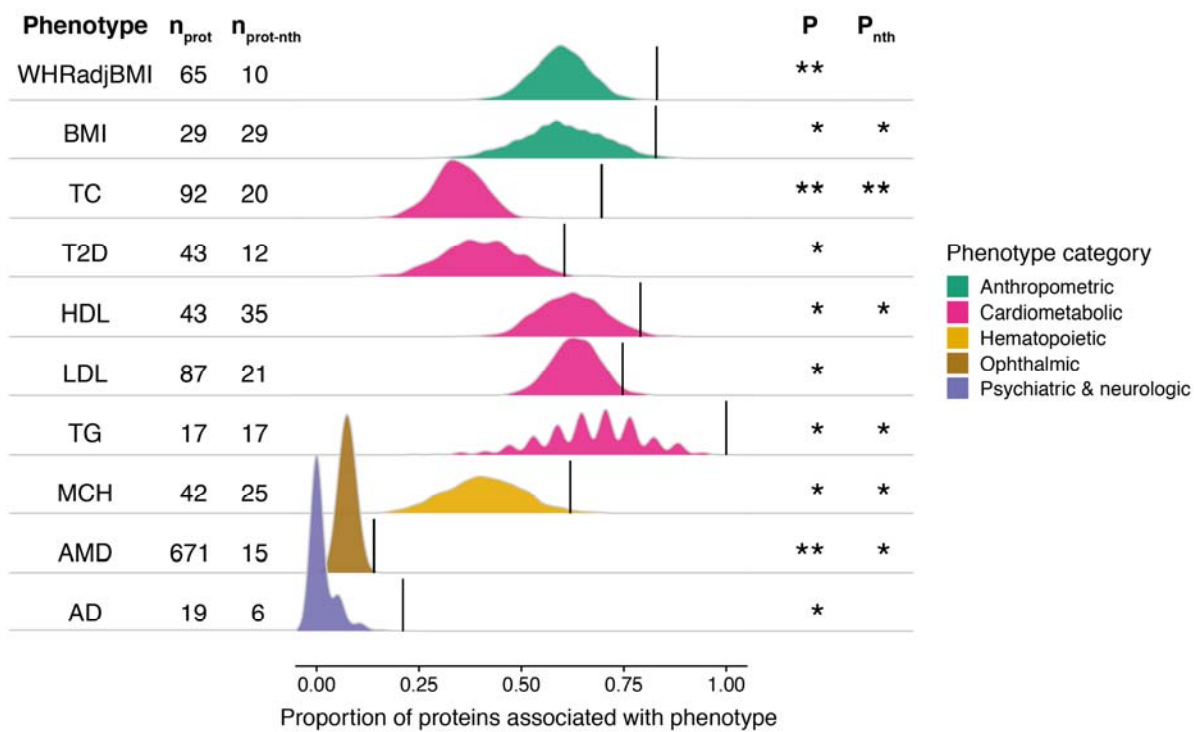

714  
 715

716 **Fig. 5** - Ridgeline plot illustrating for each GWAS phenotype the proportion of colocalized  
 717 proteins that were significantly (FDR<0.05) associated with the same trait in AGES (n = 5,457)  
 718 (black lines) compared to 1000 randomly sampled sets of proteins of the same size (density  
 719 curves), here showing only those with empirical P<0.05, see full results in Fig. S19. The number  
 720 of colocalized proteins for each trait are provided on the left-hand side, along with the number of

721 proteins remaining after the removal of proteins originating from loci with 5 or more colocalized  
722 proteins from the analysis, annotated as no transhotspots (nth). Empirical p-values for  
723 significant enrichment of trait-associations are denoted as such: \*P < 0.05, \*\*P < 0.001.  
724 WHRadjBMI, waist-to-hip ratio adjusted for BMI; TC, total cholesterol; T2D, type 2 diabetes;  
725 HDL, high-density lipoprotein cholesterol; LDL, low-density lipoprotein cholesterol; TG,  
726 triglycerides; MCH, mean corpuscular hemoglobin; AMD, age-related macular degeneration; AD  
727 Alzheimer's disease.  
728  
729



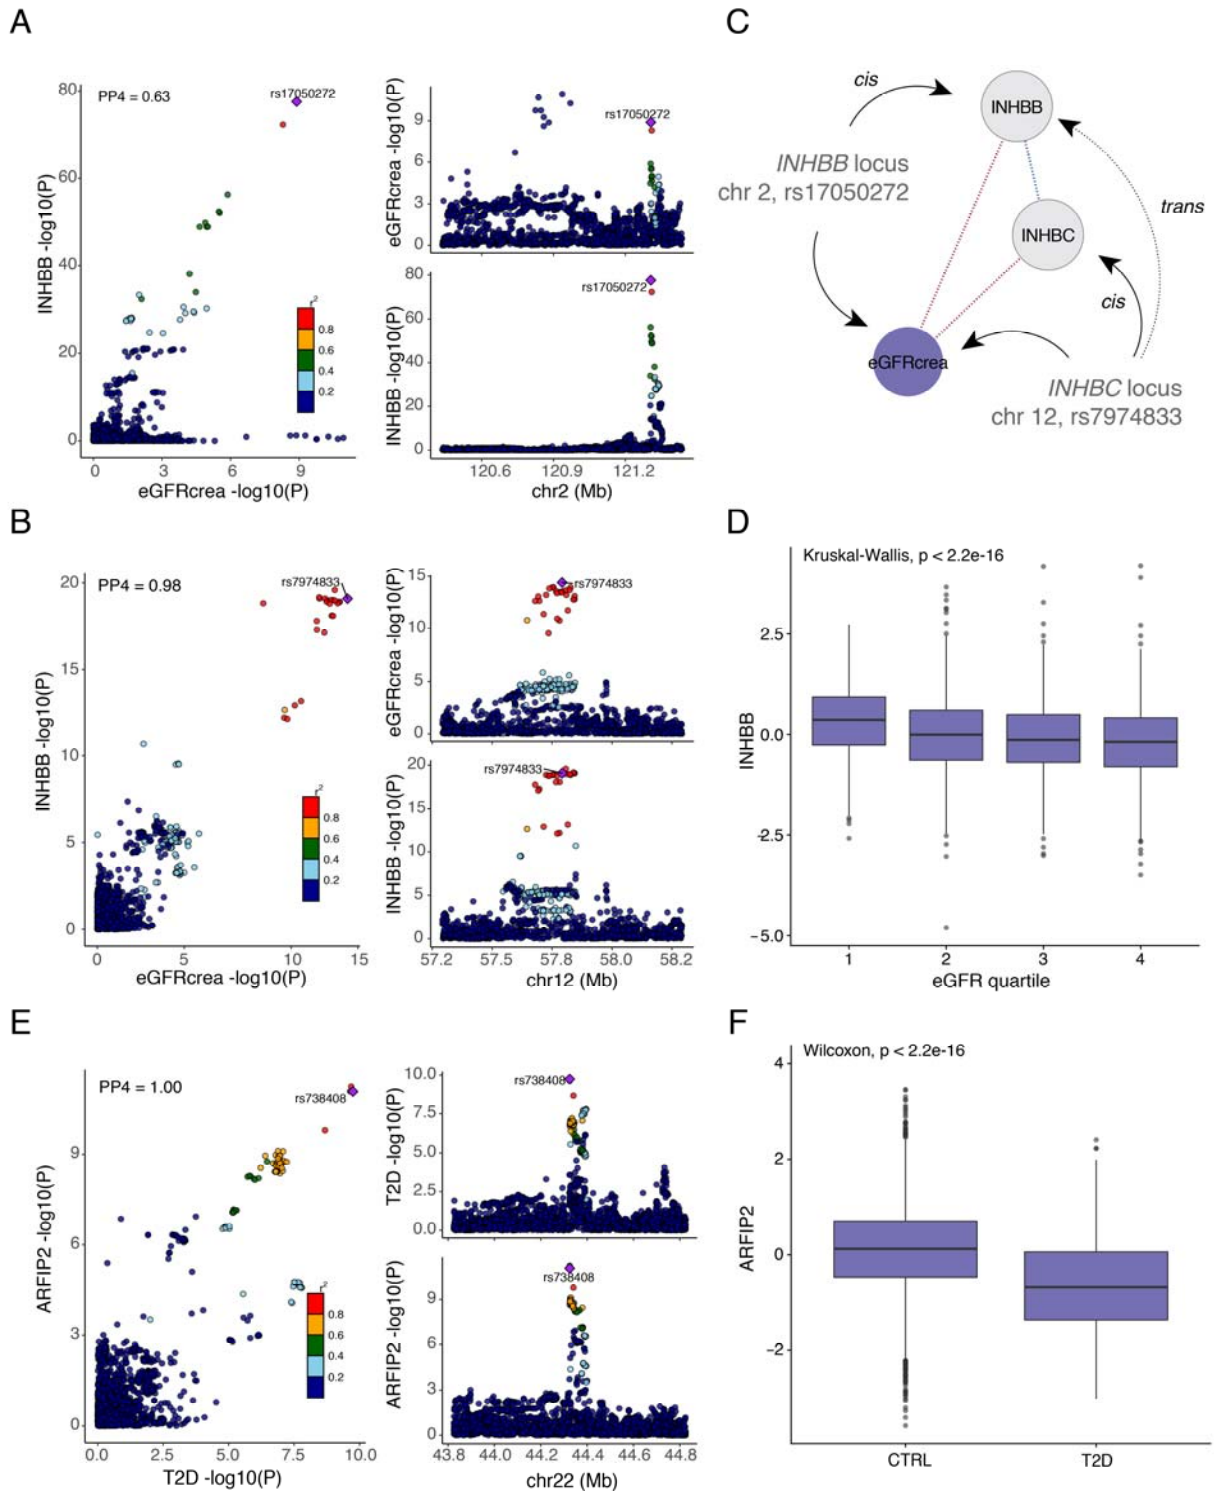

730  
731  
732  
733

**Fig. 6** – A-B, Colocalization between GWAS signals for eGFR and INHBB at A) the *INHBB* locus on chromosome 2 and B) the *INHBC* locus on chromosome 12. C) A schematic diagram showing the convergence of genetic effects on serum levels of

734 INHBB at the *INHBB* locus in *cis* and *INHBC* locus in *trans*. Variants in the *INHBC* locus  
735 furthermore affect INHBC serum levels in *cis*, albeit not reaching study-wide significance  
736 ( $P = 8.5 \times 10^{-8}$ ). Serum levels of INHBB and INHBC are positively correlated (Pearson's  $r$   
737  $= 0.32$ ,  $P = 3.4 \times 10^{-130}$ ), while both are negatively associated with eGFR (beta = -4.52,  
738 SE = 0.23,  $P = 1.3 \times 10^{-82}$  and beta = -2.62, SE = 0.22,  $P = 5.4 \times 10^{-32}$ , respectively).  
739

740

741 **References**

- 742 1. Visscher, P. M. *et al.* 10 Years of GWAS Discovery: Biology, Function, and Translation.  
743 *Am J Hum Genet* **101**, 5–22 (2017).
- 744 2. Boyle, E. A., Li, Y. I. & Pritchard, J. K. An Expanded View of Complex Traits: From  
745 Polygenic to Omnigenic. *Cell* **169**, 1177–1186 (2017).
- 746 3. Schadt, E. E. Molecular networks as sensors and drivers of common human diseases.  
747 *Nature* **461**, 218–223 (2009).
- 748 4. Maurano, M. T. *et al.* Systematic Localization of Common Disease-Associated Variation  
749 in Regulatory DNA. *Science (80- )* **337**, 1190–1195 (2012).
- 750 5. Farh, K. K. H. *et al.* Genetic and epigenetic fine mapping of causal autoimmune disease  
751 variants. *Nature* **518**, 337–343 (2015).
- 752 6. Roadmap Epigenomics Consortium *et al.* Integrative analysis of 111 reference human  
753 epigenomes. *Nature* **518**, 317–330 (2015).
- 754 7. The GTEx Consortium. The Genotype-Tissue Expression (GTEx) pilot analysis:  
755 multitissue gene regulation in humans. *Science (80- )* **348**, 648–60 (2015).
- 756 8. Emilsson, V. *et al.* Co-regulatory networks of human serum proteins link genetics to  
757 disease. *Science (80- )* **361**, 769–773 (2018).
- 758 9. Sun, B. B. *et al.* Genomic atlas of the human plasma proteome. *Nature* **558**, 73–79  
759 (2018).
- 760 10. Suhre, K. *et al.* Connecting genetic risk to disease end points through the human blood  
761 plasma proteome. *Nat Commun* **8**, 14357 (2017).
- 762 11. Pietzner, M. *et al.* Genetic architecture of host proteins involved in SARS-CoV-2 infection.  
763 *Nat Commun* **11**, 1–14 (2020).
- 764 12. Folkersen, L. *et al.* Genomic and drug target evaluation of 90 cardiovascular proteins in  
765 30,931 individuals. *Nat Metab* **2**, 1135–1148 (2020).
- 766 13. Watanabe, K. *et al.* A global overview of pleiotropy and genetic architecture in complex  
767 traits. *Nat Genet* **51**, 1339–1348 (2019).
- 768 14. Nguyen, P. A., Born, D. A., Deaton, A. M., Nioi, P. & Ward, L. D. Phenotypes associated  
769 with genes encoding drug targets are predictive of clinical trial side effects. *Nat Commun*  
770 **10**, 1579 (2019).
- 771 15. Anderson, N. L. & Anderson, N. G. The human plasma proteome: history, character, and  
772 diagnostic prospects. *Mol Cell Proteomics* **1**, 845–867 (2002).
- 773 16. Lamb, J. R., Jennings, L. L., Gudmundsdottir, V., Gudnason, V. & Emilsson, V. It's in Our

- 774 Blood: A Glimpse of Personalized Medicine. *Trends Mol Med* **27**, 20–30 (2021).
- 775 17. Suhre, K., McCarthy, M. I. & Schwenk, J. M. Genetics meets proteomics: perspectives for  
776 large population-based studies. *Nat Rev Genet* (2020). doi:10.1038/s41576-020-0268-2
- 777 18. Gudmundsdottir, V. *et al.* Circulating Protein Signatures and Causal Candidates for Type  
778 2 Diabetes. *Diabetes* **69**, 1843–1853 (2020).
- 779 19. Sen, N., Gui, B. & Kumar, R. Role of MTA1 in cancer progression and metastasis.  
780 *Cancer Metastasis Rev* **33**, 879–889 (2014).
- 781 20. Emilsson, V. *et al.* Human serum proteome profoundly overlaps with genetic signatures of  
782 disease. *bioRxiv* 2020.05.06.080440 (2020). doi:10.1101/2020.05.06.080440
- 783 21. Pietzner, M. *et al.* Cross-platform proteomics to advance genetic prioritisation strategies.  
784 *bioRxiv* 2021.03.18.435919 (2021).
- 785 22. Uhlén, M. *et al.* Tissue-based map of the human proteome. *Science (80- )* **347**, 1260419  
786 (2015).
- 787 23. Wang, D. *et al.* A deep proteome and transcriptome abundance atlas of 29 healthy  
788 human tissues. *Mol Syst Biol* **15**, 1–16 (2019).
- 789 24. Lek, M. *et al.* Analysis of protein-coding genetic variation in 60,706 humans. *Nature* **536**,  
790 285–291 (2016).
- 791 25. Li, T. *et al.* A scored human protein–protein interaction network to catalyze genomic  
792 interpretation. *Nat Methods* **14**, 61–64 (2017).
- 793 26. Cvijović, I., Good, B. H. & Desai, M. M. The effect of strong purifying selection on genetic  
794 diversity. *Genetics* **209**, 1235–1278 (2018).
- 795 27. Jeong, H., Mason, S. P., Barabási, A. L. & Oltvai, Z. N. Lethality and centrality in protein  
796 networks. *Nature* **411**, 41–42 (2001).
- 797 28. Keen-Rhinehart, E., Ondek, K. & Schneider, J. E. Neuroendocrine regulation of appetitive  
798 ingestive behavior. *Front Neurosci* **7**, (2013).
- 799 29. Adan, R. A. H. *et al.* The MC4 receptor and control of appetite. *British Journal of*  
800 *Pharmacology* **149**, 815–827 (2006).
- 801 30. Bookout, A. L. *et al.* FGF21 regulates metabolism and circadian behavior by acting on the  
802 nervous system. *Nat Med* **19**, 1147–1152 (2013).
- 803 31. Von Holstein-Rathlou, S. *et al.* FGF21 mediates endocrine control of simple sugar intake  
804 and sweet taste preference by the liver. *Cell Metab* **23**, 335–343 (2016).
- 805 32. Speliotes, E. K. *et al.* Genome-wide association analysis identifies variants associated  
806 with nonalcoholic fatty liver disease that have distinct effects on metabolic traits. *PLoS*  
807 *Genet* **7**, 1001324 (2011).

- 808 33. Ligthart, S. *et al.* Genome Analyses of >200,000 Individuals Identify 58 Loci for Chronic  
809 Inflammation and Highlight Pathways that Link Inflammation and Complex Disorders. *Am*  
810 *J Hum Genet* **103**, 691–706 (2018).
- 811 34. Raffield, L. M. *et al.* Comparison of Proteomic Assessment Methods in Multiple Cohort  
812 Studies. *Proteomics* **20**, (2020).
- 813 35. O'Connor, L. J. *et al.* Extreme Polygenicity of Complex Traits Is Explained by Negative  
814 Selection. *Am J Hum Genet* **105**, 456–476 (2019).
- 815 36. Jansen, R. *et al.* Conditional eQTL analysis reveals allelic heterogeneity of gene  
816 expression. *Hum Mol Genet* **26**, 1444–1451 (2017).
- 817 37. Hormozdiani, F. *et al.* Widespread Allelic Heterogeneity in Complex Traits. *Am J Hum*  
818 *Genet* **100**, 789–802 (2017).
- 819 38. The GTEx Consortium. The GTEx Consortium atlas of genetic regulatory effects across  
820 human tissues. *Science (80- )* **369**, 1318–1330 (2020).
- 821 39. Lehallier, B. *et al.* Undulating changes in human plasma proteome profiles across the  
822 lifespan. *Nat Med* **25**, 1843–1850 (2019).
- 823 40. Harris, T. B. *et al.* Age, gene/environment susceptibility-Reykjavik study: Multidisciplinary  
824 applied phenomics. *Am J Epidemiol* **165**, 1076–1087 (2007).
- 825 41. Peloso, G. M. *et al.* Association of low-frequency and rare coding-sequence variants with  
826 blood lipids and coronary heart disease in 56,000 whites and blacks. *Am J Hum Genet*  
827 **94**, 223–232 (2014).
- 828 42. Evangelou, E. *et al.* Genetic analysis of over one million people identifies 535 novel loci  
829 for blood pressure. *bioRxiv* 198234 (2017). doi:10.1101/198234
- 830 43. Levey, A. S., Greene, T., Kusek, J. & Beck, G. A simplified equation to predict glomerular  
831 filtration rate from serum creatinine [Abstract]. *J Am Soc Nephrol* **11**, A0828 (2000).
- 832 44. Qiu, C. *et al.* Cerebral microbleeds, retinopathy, and dementia: The AGES-Reykjavik  
833 Study. *Neurology* **75**, 2221–2228 (2010).
- 834 45. Jonasson, F. *et al.* Five-year incidence, progression, and risk factors for age-related  
835 macular degeneration: The age, gene/environment susceptibility study. *Ophthalmology*  
836 **121**, 1766–1772 (2014).
- 837 46. Mijnders, D. M. *et al.* Physical activity and incidence of sarcopenia: The population-  
838 based AGES-Reykjavik Study. *Age Ageing* **45**, 614–621 (2016).
- 839 47. Steingrimsdottir, L. *et al.* Hip Fractures and Bone Mineral Density in the Elderly—  
840 Importance of Serum 25-Hydroxyvitamin D. *PLoS One* **9**, e91122 (2014).
- 841 48. Gold, L. *et al.* Aptamer-based multiplexed proteomic technology for biomarker discovery.

- 842 *PLoS One* **5**, e15004 (2010).
- 843 49. Hathout, Y. *et al.* Large-scale serum protein biomarker discovery in Duchenne muscular  
844 dystrophy. *Proc Natl Acad Sci* **112**, 7153–7158 (2015).
- 845 50. Das, S. *et al.* Next-generation genotype imputation service and methods. *Nat Genet* **48**,  
846 1284–1287 (2016).
- 847 51. Danecek, P., McCarthy, S. & Marshall, J. bcftools.
- 848 52. Chang, C. C. *et al.* Second-generation PLINK: rising to the challenge of larger and richer  
849 datasets. *Gigascience* **4**, (2015).
- 850 53. Kuhn, M. & Johnson, K. *Applied predictive modeling. Applied Predictive Modeling*  
851 (Springer-Verlag New York, 2013). doi:10.1007/978-1-4614-6849-3
- 852 54. Yang, J., Lee, S. H., Goddard, M. E. & Visscher, P. M. GCTA: a tool for genome-wide  
853 complex trait analysis. *Am J Hum Genet* **88**, 76–82 (2011).
- 854 55. Yang, J. *et al.* Conditional and joint multiple-SNP analysis of GWAS summary statistics  
855 identifies additional variants influencing complex traits. *Nat Genet* **44**, 369–75, S1-3  
856 (2012).
- 857 56. Trowsdale, J. & Knight, J. C. Major Histocompatibility Complex Genomics and Human  
858 Disease. *Annu Rev Genomics Hum Genet* **14**, 301–323 (2013).
- 859 57. Krzywinski, M. *et al.* Circos: An information aesthetic for comparative genomics. *Genome*  
860 *Res* **19**, 1639–1645 (2009).
- 861 58. Reimand, J. *et al.* g:Profiler—a web server for functional interpretation of gene lists (2016  
862 update). *Nucleic Acids Res* **44**, W83–W89 (2016).
- 863 59. Uhlén, M. *et al.* Tissue-based map of the human proteome. *Science (80- )* **347**, 1260419  
864 (2015).
- 865 60. Welter, D. *et al.* The NHGRI GWAS Catalog, a curated resource of SNP-trait  
866 associations. *Nucleic Acids Res* **42**, D1001-6 (2014).
- 867 61. Giambartolomei, C. *et al.* Bayesian Test for Colocalisation between Pairs of Genetic  
868 Association Studies Using Summary Statistics. *PLoS Genet* **10**, (2014).
- 869 62. Wallace, C. Eliciting priors and relaxing the single causal variant assumption in  
870 colocalisation analyses. *PLoS Genet* **16**, 1–20 (2020).
- 871 63. Liu, B., Gludemans, M. J., Rao, A. S., Ingelsson, E. & Montgomery, S. B. Abundant  
872 associations with gene expression complicate GWAS follow-up. *Nat Genet* **51**, 768–769  
873 (2019).
- 874
